# Supplementary material
Source: publisher site journal article supplement (https://www.dovepress.com/article/441767)
Supplement: Supplementary file 1 [file get_supplementary_file.php]

Supplement Table 1. Time-course changes in body measurements and physical indices in Groups A and B

|         |         |         | body mass index (BMI)              |       |        |        |        |        |       |
|---------|---------|---------|------------------------------------|-------|--------|--------|--------|--------|-------|
|         |         |         | V1                                 | V2    | V3     | V4     | V5     | V6     | V7    |
| Group A | whole   | Mean    | 22.2                               | 22.0  | 22.0   | 21.7   | 21.3   | 21.5   | 21.7  |
|         |         | SD      | 3.5                                | 3.7   | 3.7    | 3.8    | 3.8    | 3.7    | 3.8   |
|         |         | p value | —                                  | NS    | 0.041  | 0.006  | <0.001 | <0.001 | 0.005 |
|         | Sa (-)  | Mean    | 26.4                               | 26.9  | 26.2   | 26.1   | 25.8   | 25.7   | 26.1  |
|         |         | SD      | 4.0                                | 4.5   | 4.2    | 4.7    | 4.6    | 4.7    | 4.7   |
|         |         | p value | —                                  | NS    | NS     | NS     | NS     | NS     | NS    |
|         | Sa (+)  | Mean    | 21.2                               | 21.1  | 21.0   | 20.8   | 20.5   | 20.8   | 20.9  |
|         |         | SD      | 2.7                                | 2.8   | 2.9    | 2.9    | 3.1    | 3.0    | 3.1   |
|         |         | p value | —                                  | NS    | NS     | 0.009  | 0.003  | 0.006  | 0.020 |
| Group B | whole   | Mean    | 22.7                               | 22.7  | 22.4   | 22.3   | 22.2   | 22.2   | 22.3  |
|         |         | SD      | 3.5                                | 3.5   | 3.5    | 3.6    | 3.7    | 3.6    | 3.6   |
|         |         | p value | —                                  | NS    | <0.001 | <0.001 | <0.001 | 0.002  | 0.004 |
|         | Sa (-)  | Mean    | 27.2                               | 27.1  | 26.8   | 26.8   | 26.8   | 26.8   | 26.8  |
|         |         | SD      | 1.1                                | 1.1   | 1.4    | 1.5    | 1.7    | 1.7    | 1.4   |
|         |         | p value | —                                  | NS    | NS     | NS     | NS     | NS     | NS    |
|         | Sa (+)  | Mean    | 21.3                               | 21.3  | 21.0   | 20.9   | 20.7   | 20.8   | 20.8  |
|         |         | SD      | 2.7                                | 2.7   | 2.6    | 2.8    | 2.8    | 2.7    | 2.8   |
|         |         | p value | —                                  | NS    | <0.001 | <0.001 | <0.001 | <0.001 | 0.01  |
|         |         |         | body weight (kg)                   |       |        |        |        |        |       |
|         |         |         | V1                                 | V2    | V3     | V4     | V5     | V6     | V7    |
| Group A | whole   | Mean    | 58.4                               | 58.1  | 58.2   | 57.8   | 56.4   | 57.5   | 57.9  |
|         |         | SD      | 11.5                               | 11.6  | 11.6   | 12     | 11.7   | 11.2   | 11.4  |
|         |         | p value | —                                  | 0.083 | 0.008  | 0.004  | <0.001 | <0.001 | 0.003 |
| Group B | whole   | Mean    | 61.5                               | 61.3  | 60.7   | 60.5   | 60.1   | 60.2   | 60.4  |
|         |         | SD      | 10.4                               | 10.5  | 10.6   | 10.9   | 11.2   | 11.2   | 11.0  |
|         |         | p value | —                                  | 0.241 | 0.002  | 0.003  | 0.001  | 0.005  | 0.005 |
|         |         |         | lower leg circumference (cm) right |       |        |        |        |        |       |
|         |         |         | V1                                 | V2    | V3     | V4     | V5     | V6     | V7    |
| Group A | whole   | Mean    | 32.6                               | 32.9  | 32.8   | 32.7   | 32.3   | 32.9   | 32.7  |
|         |         | SD      | 3.8                                | 4.0   | 4.2    | 4.3    | 4.3    | 4.2    | 4.4   |
|         |         | p value | —                                  | NS    | NS     | NS     | NS     | NS     | NS    |
|         | Sa (-)  | Mean    | 37.4                               | 37.4  | 37.6   | 38.0   | 37.1   | 37.2   | 36.9  |
|         |         | SD      | 3.0                                | 3.0   | 2.9    | 3.6    | 3.6    | 4.2    | 4.2   |
|         |         | p value | —                                  | NS    | NS     | NS     | NS     | NS     | NS    |
|         | Sa (+)  | Mean    | 31.5                               | 31.8  | 31.7   | 31.5   | 31.5   | 32.1   | 32.0  |
|         |         | SD      | 3.0                                | 3.6   | 3.7    | 3.6    | 3.9    | 3.7    | 4.0   |
|         |         | p value | —                                  | NS    | NS     | NS     | NS     | NS     | NS    |
| Group B | whole   | Mean    | 32.7                               | 32.7  | 32.8   | 32.9   | 32.7   | 32.7   | 32.9  |
|         |         | SD      | 3.0                                | 3.3   | 3.2    | 3.3    | 3.6    | 3.4    | 3.3   |
|         |         | p value | —                                  | NS    | NS     | NS     | NS     | NS     | NS    |
|         | Sa (-)  | Mean    | 36.4                               | 36.8  | 36.9   | 37.1   | 37.1   | 36.9   | 36.7  |
|         |         | SD      | 1.7                                | 1.9   | 1.7    | 2.2    | 2.2    | 2.0    | 2.2   |
|         |         | p value | —                                  | NS    | NS     | NS     | NS     | NS     | NS    |
|         | Sa (+)  | Mean    | 31.6                               | 31.4  | 31.5   | 31.6   | 31.3   | 31.4   | 31.7  |
|         |         | SD      | 2.4                                | 2.4   | 2.4    | 2.4    | 2.8    | 2.6    | 2.6   |
|         |         | p value | —                                  | NS    | NS     | NS     | NS     | NS     | NS    |
|         |         |         | lower leg circumference (cm) left  |       |        |        |        |        |       |
|         |         |         | V1                                 | V2    | V3     | V4     | V5     | V6     | V7    |
| whole   | Mean    | 32.9    | 32.9                               | 32.8  | 32.7   | 32.2   | 32.6   | 32.6   |       |
|         | SD      | 3.7     | 3.9                                | 4.0   | 4.3    | 4.1    | 3.9    | 4.2    |       |
|         | p value | —       | NS                                 | NS    | NS     | 0.038  | NS     | NS     |       |

|         |        |         |      |      |       |      |       |      |      |
|---------|--------|---------|------|------|-------|------|-------|------|------|
| Group A | Sa (-) | Mean    | 37.8 | 37.4 | 37.5  | 38.0 | 37.1  | 37.2 | 37.1 |
|         |        | SD      | 2.8  | 2.9  | 2.9   | 3.7  | 3.4   | 3.6  | 3.5  |
|         |        | p value | —    | NS   | 0.007 | NS   | NS    | NS   | NS   |
|         | Sa (+) | Mean    | 31.8 | 31.9 | 31.7  | 31.6 | 31.3  | 31.8 | 31.7 |
|         |        | SD      | 2.9  | 3.4  | 3.5   | 3.4  | 3.6   | 3.4  | 3.7  |
|         |        | p value | —    | NS   | NS    | NS   | NS    | NS   | NS   |
|         | whole  | Mean    | 33.0 | 32.9 | 33.1  | 32.9 | 32.6  | 32.8 | 32.9 |
|         |        | SD      | 3.3  | 3.0  | 3.3   | 3.1  | 3.5   | 3.4  | 3.4  |
|         |        | p value | —    | NS   | NS    | NS   | 0.008 | NS   | NS   |
| Group B | Sa (-) | Mean    | 37.2 | 36.7 | 37.1  | 36.7 | 36.7  | 36.8 | 36.7 |
|         |        | SD      | 2.0  | 1.7  | 1.8   | 2.1  | 2.5   | 2.3  | 2.4  |
|         |        | p value | —    | NS   | NS    | NS   | NS    | NS   | NS   |
|         | Sa (+) | Mean    | 31.7 | 31.7 | 31.8  | 31.7 | 31.3  | 31.5 | 31.6 |
|         |        | SD      | 2.4  | 2.2  | 2.6   | 2.4  | 2.7   | 2.7  | 2.7  |
|         |        | p value | —    | NS   | NS    | NS   | 0.018 | NS   | NS   |

|         |        | femoral circumference (cm) right |      |       |      |      |       |       |       |
|---------|--------|----------------------------------|------|-------|------|------|-------|-------|-------|
|         |        | V1                               | V2   | V3    | V4   | V5   | V6    | V7    |       |
|         | whole  | Mean                             | 41.6 | 41.6  | 41.7 | 41.6 | 40.6  | 40.9  | 41.1  |
|         |        | SD                               | 5.9  | 5.9   | 5.9  | 6.2  | 5.6   | 5.5   | 6.2   |
|         |        | p value                          | —    | NS    | NS   | NS   | NS    | NS    | NS    |
| Group A | Sa (-) | Mean                             | 48.8 | 47.9  | 48.4 | 48.0 | 46.7  | 46.8  | 46.7  |
|         |        | SD                               | 4.8  | 4.6   | 4.4  | 4.8  | 4.5   | 4.7   | 5.7   |
|         |        | p value                          | —    | 0.034 | NS   | NS   | 0.044 | 0.049 | 0.015 |
|         | Sa (+) | Mean                             | 40.1 | 40.2  | 40.2 | 40.2 | 39.5  | 39.9  | 40.0  |
|         |        | SD                               | 5.0  | 5.2   | 5.2  | 5.6  | 5.1   | 5.0   | 5.8   |
|         |        | p value                          | —    | NS    | NS   | NS   | NS    | NS    | NS    |
|         | whole  | Mean                             | 42.2 | 42.1  | 42.1 | 42.4 | 41.9  | 41.6  | 42.4  |
|         |        | SD                               | 4.3  | 4.5   | 4.5  | 4.4  | 5.0   | 4.8   | 4.7   |
|         |        | p value                          | —    | NS    | NS   | NS   | NS    | NS    | NS    |
| Group B | Sa (-) | Mean                             | 46.8 | 47.4  | 47.5 | 47.5 | 47.6  | 47.3  | 47.9  |
|         |        | SD                               | 1.3  | 2.3   | 2.2  | 2.6  | 3.1   | 2.6   | 2.8   |
|         |        | p value                          | —    | NS    | NS   | NS   | NS    | NS    | NS    |
|         | Sa (+) | Mean                             | 40.7 | 40.4  | 40.5 | 40.8 | 40.1  | 39.9  | 40.6  |
|         |        | SD                               | 3.9  | 3.6   | 3.6  | 3.4  | 4.1   | 3.8   | 3.7   |
|         |        | p value                          | —    | NS    | NS   | NS   | 0.047 | 0.033 | NS    |

|         |        | femoral circumference (cm) left |      |      |      |       |      |       |      |
|---------|--------|---------------------------------|------|------|------|-------|------|-------|------|
|         |        | V1                              | V2   | V3   | V4   | V5    | V6   | V7    |      |
|         | whole  | Mean                            | 41.6 | 41.8 | 41.6 | 41.6  | 40.7 | 41.2  | 41.3 |
|         |        | SD                              | 5.5  | 5.6  | 5.4  | 5.6   | 5.2  | 5.1   | 5.5  |
|         |        | p value                         | —    | NS   | NS   | NS    | NS   | NS    | NS   |
| Group A | Sa (-) | Mean                            | 47.8 | 47.5 | 47.6 | 47.5  | 46.6 | 46.7  | 45.5 |
|         |        | SD                              | 3.3  | 3.9  | 3.3  | 3.8   | 4.0  | 4.4   | 5.6  |
|         |        | p value                         | —    | NS   | NS   | NS    | NS   | NS    | NS   |
|         | Sa (+) | Mean                            | 40.3 | 40.5 | 40.2 | 40.3  | 39.6 | 40.2  | 40.5 |
|         |        | SD                              | 5.0  | 5.1  | 4.9  | 5.1   | 4.7  | 4.6   | 5.2  |
|         |        | p value                         | —    | NS   | NS   | NS    | NS   | NS    | NS   |
|         | whole  | Mean                            | 41.9 | 42.0 | 42.0 | 42.4  | 41.6 | 41.4  | 42.2 |
|         |        | SD                              | 4.4  | 4.2  | 4.3  | 4.4   | 4.8  | 4.7   | 4.6  |
|         |        | p value                         | —    | NS   | NS   | 0.047 | NS   | NS    | NS   |
| Group B | Sa (-) | Mean                            | 46.6 | 47.0 | 47.2 | 47.5  | 47.1 | 46.9  | 47.5 |
|         |        | SD                              | 0.9  | 2.1  | 1.5  | 2.5   | 2.3  | 2.1   | 2.1  |
|         |        | p value                         | —    | NS   | NS   | NS    | NS   | NS    | NS   |
|         | Sa (+) | Mean                            | 40.4 | 40.4 | 40.4 | 40.8  | 39.9 | 39.7  | 40.4 |
|         |        | SD                              | 4.0  | 3.4  | 3.6  | 3.6   | 4.0  | 3.9   | 3.7  |
|         |        | p value                         | —    | NS   | NS   | NS    | NS   | 0.030 | NS   |

|         |        |         | grip strength (kpf) right         |       |       |       |        |        |        |
|---------|--------|---------|-----------------------------------|-------|-------|-------|--------|--------|--------|
|         |        |         | V1                                | V2    | V3    | V4    | V5     | V6     | V7     |
| Group A | whole  | Mean    | 32.1                              | 32.2  | 32.3  | 32.1  | 31.1   | 32.5   | 32.0   |
|         |        | SD      | 8.5                               | 8.6   | 8.8   | 9.4   | 9.0    | 8.0    | 7.7    |
|         |        | p value | —                                 | NS    | NS    | NS    | NS     | NS     | NS     |
|         | Sa (-) | Mean    | 37.8                              | 39.8  | 39.6  | 41.8  | 37.3   | 37.3   | 37.8   |
|         |        | SD      | 8.9                               | 2.8   | 5.9   | 7.5   | 7.5    | 7.1    | 8.3    |
|         |        | p value | —                                 | NS    | NS    | NS    | NS     | NS     | NS     |
|         | Sa (+) | Mean    | 30.9                              | 30.5  | 30.7  | 30.0  | 30.0   | 31.6   | 30.9   |
|         |        | SD      | 8.1                               | 8.5   | 8.6   | 8.6   | 8.9    | 7.9    | 7.2    |
|         |        | p value | —                                 | NS    | NS    | NS    | NS     | NS     | NS     |
| Group B | whole  | Mean    | 33.4                              | 34.8  | 34.8  | 34.2  | 34.0   | 33.7   | 35.2   |
|         |        | SD      | 9.0                               | 8.3   | 8.7   | 8.9   | 8.7    | 8.3    | 7.8    |
|         |        | p value | —                                 | NS    | NS    | NS    | NS     | NS     | 0.045  |
|         | Sa (-) | Mean    | 37.7                              | 37.8  | 39.0  | 37.0  | 36.0   | 35.7   | 39.2   |
|         |        | SD      | 7.7                               | 6.9   | 6.6   | 6.3   | 4.9    | 6.1    | 5.4    |
|         |        | p value | —                                 | NS    | NS    | NS    | NS     | NS     | NS     |
|         | Sa (+) | Mean    | 31.8                              | 33.7  | 33.2  | 32.9  | 32.8   | 32.6   | 33.3   |
|         |        | SD      | 8.8                               | 8.5   | 8.7   | 9.0   | 8.8    | 8.1    | 7.5    |
|         |        | p value | —                                 | 0.028 | NS    | NS    | NS     | NS     | NS     |
|         |        |         | grip strength (kpf) left          |       |       |       |        |        |        |
|         |        |         | V1                                | V2    | V3    | V4    | V5     | V6     | V7     |
| Group A | whole  | Mean    | 29.4                              | 28.6  | 28.4  | 28.3  | 27.4   | 27.9   | 27.5   |
|         |        | SD      | 9.4                               | 9.3   | 9.3   | 9.8   | 10.0   | 9.1    | 8.9    |
|         |        | p value | —                                 | NS    | NS    | NS    | 0.025  | 0.043  | NS     |
|         | Sa (-) | Mean    | 36.2                              | 36.6  | 36.6  | 38.6  | 35.8   | 36.3   | 35.0   |
|         |        | SD      | 7.5                               | 5.2   | 3.1   | 4.8   | 4.8    | 3.3    | 6.6    |
|         |        | p value | —                                 | NS    | NS    | NS    | NS     | NS     | NS     |
|         | Sa (+) | Mean    | 27.9                              | 26.8  | 26.7  | 26.1  | 25.8   | 26.4   | 26.0   |
|         |        | SD      | 9.2                               | 9.1   | 9.2   | 9.2   | 10.0   | 9.0    | 8.7    |
|         |        | p value | —                                 | 0.039 | 0.019 | 0.005 | 0.009  | 0.009  | 0.042  |
| Group B | whole  | Mean    | 31.7                              | 31.8  | 32.4  | 32.3  | 31.5   | 31.5   | 32.3   |
|         |        | SD      | 9.0                               | 7.7   | 7.9   | 9.0   | 9.0    | 8.7    | 8.3    |
|         |        | p value | —                                 | NS    | NS    | NS    | NS     | NS     | NS     |
|         | Sa (-) | Mean    | 35.2                              | 34.3  | 35.8  | 35.8  | 34.5   | 35.0   | 34.2   |
|         |        | SD      | 5.5                               | 6.0   | 6.7   | 5.8   | 5.4    | 4.7    | 4.4    |
|         |        | p value | —                                 | NS    | NS    | NS    | NS     | NS     | NS     |
|         | Sa (+) | Mean    | 30.1                              | 30.7  | 30.9  | 30.4  | 29.9   | 29.7   | 30.4   |
|         |        | SD      | 9.1                               | 7.8   | 7.4   | 8.5   | 9.0    | 8.3    | 7.7    |
|         |        | p value | —                                 | NS    | NS    | NS    | NS     | NS     | NS     |
|         |        |         | finger pinch strength (kpf) right |       |       |       |        |        |        |
|         |        |         | V1                                | V2    | V3    | V4    | V5     | V6     | V7     |
| Group A | whole  | Mean    | 8.37                              | 8.31  | 8.61  | 8.87  | 9.62   | 9.82   | 9.96   |
|         |        | SD      | 2.08                              | 2.27  | 2.47  | 2.81  | 2.55   | 2.50   | 2.21   |
|         |        | p value | —                                 | NS    | NS    | NS    | <0.001 | 0.001  | <0.001 |
|         | Sa (-) | Mean    | 8.28                              | 8.54  | 9.60  | 10.40 | 11.55  | 11.73  | 11.35  |
|         |        | SD      | 0.89                              | 0.37  | 1.25  | 3.66  | 2.20   | 2.19   | 2.43   |
|         |        | p value | —                                 | NS    | NS    | NS    | 0.020  | 0.019  | 0.031  |
|         | Sa (+) | Mean    | 8.39                              | 8.25  | 8.40  | 8.53  | 9.26   | 9.47   | 9.70   |
|         |        | SD      | 2.28                              | 2.51  | 2.63  | 2.57  | 2.49   | 2.44   | 2.12   |
|         |        | p value | —                                 | NS    | NS    | NS    | 0.011  | 0.015  | 0.006  |
| Group B | whole  | Mean    | 8.88                              | 9.25  | 9.50  | 9.54  | 10.97  | 11.04  | 11.11  |
|         |        | SD      | 2.33                              | 2.34  | 2.18  | 2.39  | 2.41   | 2.25   | 2.16   |
|         |        | p value | —                                 | NS    | NS    | NS    | <0.001 | <0.001 | <0.001 |
|         | Sa (-) | Mean    | 9.00                              | 8.82  | 9.57  | 9.42  | 11.90  | 11.58  | 11.57  |
|         |        | SD      | 2.14                              | 1.62  | 1.93  | 2.74  | 2.06   | 2.52   | 1.77   |

|         |         | p value                          | —     | NS    | NS    | NS    | 0.032  | 0.037  | 0.017  |
|---------|---------|----------------------------------|-------|-------|-------|-------|--------|--------|--------|
| Sa (+)  | Mean    | 8.84                             | 9.38  | 9.48  | 9.57  | 10.68 | 10.86  | 10.96  |        |
|         | SD      | 2.44                             | 2.55  | 2.30  | 2.35  | 2.48  | 2.20   | 2.31   |        |
|         | p value | —                                | 0.045 | NS    | 0.039 | 0.001 | <0.001 | <0.001 |        |
|         |         | finger pinch strength (kpf) left |       |       |       |       |        |        |        |
|         |         | V1                               | V2    | V3    | V4    | V5    | V6     | V7     |        |
| Group A | whole   | Mean                             | 7.93  | 7.77  | 8.45  | 8.05  | 8.88   | 9.00   | 9.36   |
|         |         | SD                               | 2.12  | 2.18  | 2.26  | 2.77  | 2.55   | 2.53   | 2.27   |
|         |         | p value                          | —     | NS    | 0.04  | NS    | 0.015  | 0.013  | <0.001 |
|         | Sa (-)  | Mean                             | 8.04  | 8.18  | 9.24  | 8.86  | 10.31  | 10.43  | 11.07  |
|         |         | SD                               | 0.68  | 0.97  | 1.68  | 3.09  | 1.35   | 1.28   | 1.59   |
|         |         | p value                          | —     | NS    | NS    | NS    | NS     | 0.026  | 0.045  |
|         | Sa (+)  | Mean                             | 7.90  | 7.67  | 8.28  | 7.87  | 8.62   | 8.75   | 9.06   |
|         |         | SD                               | 2.33  | 2.38  | 2.36  | 2.74  | 2.64   | 2.63   | 2.31   |
|         |         | p value                          | —     | NS    | NS    | NS    | NS     | NS     | 0.004  |
| Group B | whole   | Mean                             | 7.78  | 8.13  | 8.76  | 8.93  | 9.81   | 10.16  | 10.23  |
|         |         | SD                               | 2.49  | 2.13  | 2.10  | 2.04  | 2.11   | 2.25   | 2.31   |
|         |         | p value                          | —     | NS    | 0.021 | 0.006 | <0.001 | <0.001 | <0.001 |
|         | Sa (-)  | Mean                             | 8.50  | 7.97  | 10.00 | 9.82  | 11.02  | 11.57  | 11.44  |
|         |         | SD                               | 2.05  | 1.18  | 2.58  | 1.58  | 2.09   | 2.95   | 2.48   |
|         |         | p value                          | —     | NS    | NS    | NS    | NS     | NS     | NS     |
|         | Sa (+)  | Mean                             | 7.55  | 8.18  | 8.37  | 8.65  | 9.43   | 9.72   | 9.71   |
|         |         | SD                               | 2.62  | 2.38  | 1.83  | 2.13  | 2.02   | 1.87   | 2.10   |
|         |         | p value                          | —     | 0.037 | 0.024 | 0.015 | <0.001 | <0.001 | <0.001 |

p value: paired t test

Abbreviations: Sa(-): COPD patients with no sarcopenia, Sa(+): COPD patients with sarcopenia, NS: no statistical significance

Supplement Table 2. Results of examination of correlations between items (week 0–week 12 change )

Upper right: Pearson's correlation coefficient, lower left: *p*-value in the significance test of Pearson's correlation coefficient

| Group A                             | Body measurements and physical indices |                                    |               |        |                       |                      |                               |                              |                                 |                                |                               |                              |         |        | Items related to quality of life (QOL) questionnaires |                               |                      |                         |        |        |        | Respiratory function test |                     |        |
|-------------------------------------|----------------------------------------|------------------------------------|---------------|--------|-----------------------|----------------------|-------------------------------|------------------------------|---------------------------------|--------------------------------|-------------------------------|------------------------------|---------|--------|-------------------------------------------------------|-------------------------------|----------------------|-------------------------|--------|--------|--------|---------------------------|---------------------|--------|
|                                     | knee extension leg strength (right)    | knee extension leg strength (left) | walking speed | 6MWD   | grip strength (right) | grip strength (left) | finger pinch strength (right) | finger pinch strength (left) | lower leg circumference (right) | lower leg circumference (left) | femoral circumference (right) | femoral circumference (left) | BMI     | SMI    | symptom of fatigue (VAS scale)                        | symptom of apathy (VAS scale) | anxiety scale (HADS) | depression scale (HADS) | SNAQ   | CAT    | mMRC   | FEV <sub>1,0%</sub>       | %FEV <sub>1,0</sub> | %VC    |
| knee extension leg strength (right) |                                        | 0.791                              | 0.002         | 0.640  | 0.140                 | 0.431                | 0.434                         | 0.374                        | 0.045                           | 0.307                          | 0.194                         | 0.298                        | 0.415   | 0.215  | 0.652                                                 | 0.572                         | 0.423                | 0.708                   | 0.283  | -0.287 | 0.222  | 0.120                     | 0.006               | -0.136 |
| knee extension leg strength (left)  | <0.0001                                |                                    | 0.008         | 0.448  | 0.374                 | 0.674                | 0.468                         | 0.341                        | 0.248                           | 0.408                          | 0.223                         | 0.101                        | 0.490   | 0.267  | 0.235                                                 | 0.916                         | 0.358                | 0.458                   | 0.286  | -0.392 | 0.091  | 0.052                     | -0.126              | -0.053 |
| walking speed                       | 0.560                                  | 0.488                              |               | 0.568  | 0.097                 | 0.119                | 0.317                         | 0.188                        | -0.005                          | 0.021                          | 0.341                         | 0.196                        | 0.207   | 0.165  | 0.141                                                 | 0.116                         | 0.673                | 0.515                   | 0.148  | -0.295 | 0.399  | 0.035                     | 0.044               | 0.239  |
| 6MWD                                | 0.000                                  | 0.017                              | 0.002         |        | 0.250                 | 0.047                | 0.531                         | 0.384                        | 0.438                           | 0.083                          | 0.106                         | 0.007                        | 0.432   | 0.295  | 0.835                                                 | 0.895                         | 0.499                | 0.884                   | 0.178  | -0.322 | 0.025  | -0.233                    | 0.060               | -0.038 |
| grip strength (right)               | 0.478                                  | 0.050                              | 0.622         | 0.200  |                       | 0.414                | 0.521                         | 0.286                        | 0.026                           | 0.053                          | 0.820                         | 0.839                        | 0.450   | 0.246  | 0.802                                                 | 0.422                         | 0.075                | 0.864                   | 0.390  | -0.278 | 0.073  | 0.003                     | -0.212              | -0.045 |
| grip strength (left)                | 0.022                                  | <0.0001                            | 0.548         | 0.811  | 0.028                 |                      | 0.313                         | 0.098                        | 0.151                           | 0.379                          | 0.748                         | 0.391                        | 0.214   | -0.016 | 0.185                                                 | 0.969                         | 0.171                | 0.509                   | 0.343  | -0.196 | 0.297  | -0.270                    | -0.034              | 0.112  |
| finger pinch strength (right)       | 0.021                                  | 0.012                              | 0.101         | 0.004  | 0.004                 | 0.105                |                               | 0.760                        | 0.028                           | 0.013                          | 0.386                         | 0.157                        | 0.435   | 0.427  | 0.791                                                 | 0.143                         | 0.086                | 0.273                   | 0.228  | -0.179 | 0.339  | -0.157                    | 0.138               | -0.164 |
| finger pinch strength (left)        | 0.050                                  | 0.076                              | 0.338         | 0.044  | 0.140                 | 0.622                | <0.0001                       |                              | 0.800                           | 0.406                          | 0.911                         | 0.622                        | 0.193   | 0.277  | 0.539                                                 | 0.073                         | 0.205                | 0.138                   | 0.342  | -0.203 | -0.135 | -0.604                    | -0.306              | 0.541  |
| lower leg circumference (right)     | 0.820                                  | 0.204                              | 0.979         | 0.153  | 0.421                 | 0.279                | 0.415                         | 0.050                        |                                 | 0.822                          | 0.096                         | 0.032                        | 0.632   | 0.486  | 0.336                                                 | 0.287                         | 0.624                | 0.674                   | 0.182  | -0.155 | -0.005 | -0.464                    | -0.237              | 0.323  |
| lower leg circumference (left)      | 0.112                                  | 0.031                              | 0.914         | 0.334  | 0.370                 | 0.173                | 0.463                         | 0.163                        | <0.0001                         |                                | 0.158                         | 0.214                        | 0.639   | 0.549  | 0.115                                                 | 0.268                         | 0.765                | 0.765                   | 0.082  | -0.168 | -0.094 | -0.215                    | -0.012              | 0.048  |
| femoral circumference (right)       | 0.323                                  | 0.254                              | 0.076         | 0.312  | 0.045                 | -0.064               | 0.170                         | 0.022                        | 0.627                           | 0.424                          |                               | 0.698                        | 0.469   | 0.434  | 0.203                                                 | 0.972                         | 0.831                | 0.636                   | 0.156  | -0.238 | -0.041 | -0.104                    | 0.068               | 0.004  |
| femoral circumference (left)        | 0.124                                  | 0.609                              | 0.316         | 0.499  | 0.040                 | -0.169               | 0.275                         | 0.098                        | 0.873                           | 0.274                          | <0.0001                       |                              | 0.469   | 0.438  | 0.043                                                 | 0.453                         | 0.780                | 0.642                   | 0.040  | -0.202 | -0.005 | -0.040                    | 0.236               | 0.125  |
| BMI                                 | 0.028                                  | 0.008                              | 0.290         | 0.022  | 0.016                 | 0.275                | 0.021                         | 0.326                        | 0.000                           | 0.000                          | 0.012                         | 0.012                        |         | 0.797  | 0.360                                                 | 0.258                         | 0.676                | 0.612                   | 0.370  | -0.355 | -0.232 | -0.568                    | -0.108              | 0.098  |
| SMI                                 | 0.271                                  | 0.170                              | 0.401         | 0.128  | 0.207                 | 0.936                | 0.023                         | 0.153                        | 0.009                           | 0.003                          | 0.021                         | 0.020                        | <0.0001 |        | 0.449                                                 | 0.519                         | 0.842                | 0.546                   | 0.323  | -0.372 | -0.003 | -0.483                    | -0.191              | 0.133  |
| symptom of fatigue (VAS scale)      | 0.089                                  | 0.232                              | 0.285         | 0.041  | 0.050                 | 0.258                | -0.053                        | -0.121                       | -0.189                          | -0.305                         | -0.248                        | -0.385                       | -0.180  | -0.149 |                                                       | 0.563                         | 0.117                | 0.039                   | -0.168 | 0.098  | 0.167  | 0.324                     | 0.083               | 0.176  |
| symptom of apathy (VAS scale)       | 0.112                                  | 0.021                              | 0.304         | 0.026  | -0.158                | -0.008               | -0.284                        | -0.344                       | -0.209                          | -0.217                         | -0.007                        | -0.148                       | -0.221  | -0.127 | 0.002                                                 |                               | -0.080               | -0.118                  | -0.328 | 0.148  | 0.092  | 0.336                     | -0.139              | 0.194  |
| anxiety scale (HADS)                | -0.158                                 | -0.181                             | -0.084        | -0.133 | -0.342                | -0.266               | -0.330                        | -0.247                       | -0.097                          | -0.059                         | -0.042                        | -0.055                       | -0.083  | 0.039  | 0.554                                                 | 0.684                         |                      | 0.506                   | -0.137 | 0.061  | 0.000  | 0.156                     | 0.176               | -0.076 |
| depression scale (HADS)             | -0.074                                 | -0.146                             | -0.128        | -0.029 | -0.034                | -0.130               | -0.215                        | -0.288                       | -0.083                          | 0.059                          | 0.094                         | 0.092                        | -0.100  | -0.119 | 0.844                                                 | 0.551                         | 0.006                |                         | -0.105 | 0.266  | 0.191  | 0.229                     | 0.438               | 0.069  |
| SNAQ                                | 0.145                                  | 0.141                              | 0.454         | 0.366  | 0.040                 | 0.074                | 0.243                         | 0.075                        | 0.355                           | 0.678                          | 0.428                         | 0.842                        | 0.053   | 0.093  | 0.392                                                 | 0.088                         | 0.488                | 0.596                   |        | -0.666 | -0.051 | -0.194                    | 0.160               | -0.072 |
| CAT                                 | 0.139                                  | 0.039                              | 0.128         | 0.095  | 0.152                 | 0.318                | 0.363                         | 0.300                        | 0.430                           | 0.394                          | 0.222                         | 0.302                        | 0.064   | 0.052  | 0.619                                                 | 0.453                         | 0.757                | 0.171                   | 0.000  |        | 0.102  | 0.123                     | -0.067              | -0.063 |
| mMRC                                | 0.256                                  | 0.644                              | 0.035         | 0.979  | 0.898                 | 0.711                | 0.125                         | 0.077                        | 0.495                           | 0.979                          | 0.635                         | 0.835                        | 0.235   | 0.987  | 0.395                                                 | 0.640                         | 1.000                | 0.331                   | 0.797  | 0.607  |        | 0.067                     | 0.063               | 0.095  |
| FEV <sub>1,0%</sub>                 | 0.543                                  | 0.791                              | 0.861         | 0.841  | 0.232                 | 0.987                | 0.166                         | 0.425                        | 0.001                           | 0.013                          | 0.272                         | 0.599                        | 0.002   | 0.009  | 0.093                                                 | 0.081                         | 0.427                | 0.242                   | 0.323  | 0.534  | 0.735  |                           | 0.313               | -0.179 |
| %FEV <sub>1,0</sub>                 | 0.976                                  | 0.523                              | 0.824         | 0.227  | 0.760                 | 0.279                | 0.863                         | 0.483                        | 0.113                           | 0.226                          | 0.951                         | 0.733                        | 0.583   | 0.330  | 0.674                                                 | 0.480                         | 0.371                | 0.020                   | 0.416  | 0.733  | 0.750  | 0.105                     |                     | 0.017  |
| %VC                                 | 0.491                                  | 0.788                              | 0.220         | 0.527  | 0.850                 | 0.822                | 0.570                         | 0.404                        | 0.003                           | 0.094                          | 0.810                         | 0.985                        | 0.620   | 0.499  | 0.370                                                 | 0.322                         | 0.701                | 0.727                   | 0.717  | 0.749  | 0.632  | 0.363                     | 0.931               |        |

Upper right: Pearson's correlation coefficient, lower left:  $p$ -value in the significance test of Pearson's correlation coefficient

| group B                             | Body measurements and physical indices |                                    |                   |        |                       |                      |                               |                              |                                 |                                |                               |                              |        |        | Items related to quality of life (QOL) questionnaires |                               |                      |                         |        |        |        | Respiratory function test |                     |        |
|-------------------------------------|----------------------------------------|------------------------------------|-------------------|--------|-----------------------|----------------------|-------------------------------|------------------------------|---------------------------------|--------------------------------|-------------------------------|------------------------------|--------|--------|-------------------------------------------------------|-------------------------------|----------------------|-------------------------|--------|--------|--------|---------------------------|---------------------|--------|
|                                     | knee extension leg strength (right)    | knee extension leg strength (left) | walking speed     | 6MWD   | grip strength (right) | grip strength (left) | finger pinch strength (right) | finger pinch strength (left) | lower leg circumference (right) | lower leg circumference (left) | femoral circumference (right) | femoral circumference (left) | BMI    | SMI    | symptom of fatigue (VAS scale)                        | symptom of apathy (VAS scale) | anxiety scale (HADS) | depression scale (HADS) | SNAQ   | CAT    | mMRC   | FEV <sub>1,0%</sub>       | %FEV <sub>1,0</sub> | %VC    |
| knee extension leg strength (right) |                                        | 0.566                              | 0.607             | 0.256  | 0.554                 | 0.380                | 0.133                         | 0.418                        | 0.302                           | 0.299                          | -0.038                        | 0.057                        | 0.401  | 0.064  | 0.663                                                 | 0.116                         | 0.827                | 0.445                   | 0.008  | -0.060 | -0.360 | 0.111                     | 0.118               | 0.082  |
| knee extension leg strength (left)  | 0.003                                  |                                    | 0.848             | 0.457  | 0.323                 | 0.446                | 0.355                         | 0.340                        | 0.389                           | 0.288                          | -0.117                        | -0.171                       | 0.070  | -0.069 | 0.426                                                 | 0.887                         | 0.871                | 0.476                   | 0.031  | -0.220 | -0.067 | 0.234                     | 0.048               | -0.133 |
| walking speed                       | 0.108                                  | 0.040                              |                   | 0.482  | 0.176                 | 0.058                | -0.164                        | 0.031                        | -0.168                          | -0.459                         | -0.382                        | -0.250                       | 0.035  | 0.021  | 0.370                                                 | 0.161                         | 0.860                | 0.359                   | -0.084 | 0.084  | 0.114  | -0.450                    | -0.713              | -0.411 |
| 6MWD                                | 0.216                                  | 0.022                              | 0.015             |        | 0.425                 | 0.377                | 0.163                         | 0.124                        | 0.338                           | 0.993                          | 0.530                         | 0.837                        | 0.215  | -0.015 | 0.186                                                 | 0.860                         | 0.604                | 0.175                   | -0.272 | -0.104 | -0.101 | -0.029                    | -0.177              | -0.127 |
| grip strength (right)               | 0.004                                  | 0.116                              | 0.401             | 0.034  |                       | 0.682                | 0.037                         | 0.124                        | 0.819                           | 0.559                          | 0.810                         | 0.751                        | 0.464  | 0.318  | 0.385                                                 | 0.495                         | 0.185                | 0.936                   | -0.186 | -0.037 | 0.078  | -0.014                    | -0.058              | 0.052  |
| grip strength (left)                | 0.061                                  | 0.026                              | 0.782             | 0.063  | 0.000                 |                      | -0.040                        | -0.021                       | 0.473                           | 0.609                          | 0.462                         | 0.166                        | 0.342  | -0.016 | 0.451                                                 | 0.577                         | 0.819                | 0.703                   | -0.069 | -0.343 | 0.010  | 0.246                     | -0.043              | -0.161 |
| finger pinch strength (right)       | 0.528                                  | 0.082                              | 0.433             | 0.437  | 0.862                 | 0.849                |                               | 0.648                        | 0.661                           | 0.587                          | 0.610                         | 0.272                        | 0.307  | 0.504  | 0.096                                                 | 0.263                         | 0.689                | 0.748                   | -0.017 | -0.361 | 0.017  | 0.264                     | 0.172               | -0.128 |
| finger pinch strength (left)        | 0.038                                  | 0.096                              | 0.882             | 0.555  | 0.556                 | 0.922                | 0.001                         |                              | 0.346                           | 0.900                          | 0.587                         | 0.546                        | 0.737  | 0.580  | 0.375                                                 | 0.601                         | 0.869                | 0.299                   | -0.046 | -0.085 | -0.036 | -0.048                    | -0.092              | -0.247 |
| lower leg circumference (right)     | 0.143                                  | 0.055                              | 0.424             | 0.200  | 0.048                 | 0.151                | 0.092                         | 0.197                        |                                 | 0.491                          | 0.111                         | 0.544                        | 0.262  | 0.094  | 0.461                                                 | 0.214                         | 0.484                | 0.257                   | 0.025  | -0.088 | -0.224 | 0.287                     | -0.033              | -0.236 |
| lower leg circumference (left)      | 0.146                                  | 0.163                              | 0.021             | 0.002  | 0.123                 | 0.108                | 0.114                         | 0.026                        | 0.013                           |                                | 0.062                         | 0.279                        | 0.462  | 0.369  | 0.335                                                 | 0.174                         | 0.748                | 0.390                   | 0.158  | -0.068 | -0.174 | <b>0.502</b>              | <b>0.427</b>        | 0.233  |
| femoral circumference (right)       | 0.859                                  | 0.576                              | 0.059             | -0.132 | -0.051                | 0.154                | -0.107                        | -0.114                       | 0.596                           | 0.770                          |                               | 0.557                        | -0.140 | -0.154 | 0.536                                                 | 0.224                         | 0.768                | 0.720                   | -0.156 | -0.043 | -0.332 | 0.368                     | 0.219               | 0.163  |
| femoral circumference (left)        | 0.786                                  | 0.414                              | 0.228             | -0.043 | -0.067                | 0.286                | -0.228                        | -0.127                       | 0.005                           | 0.177                          | 0.004                         |                              | -0.165 | -0.141 | 0.905                                                 | 0.385                         | 0.114                | 0.710                   | 0.043  | -0.247 | -0.333 | 0.287                     | -0.032              | -0.192 |
| BMI                                 | 0.047                                  | 0.740                              | 0.868             | 0.303  | 0.205                 | 0.020                | 0.504                         | 0.430                        | 0.019                           | 0.094                          | 0.136                         | <0.0001                      |        | 0.546  | 0.500                                                 | 0.279                         | 0.412                | 0.860                   | 0.072  | -0.242 | -0.253 | 0.294                     | -0.069              | -0.109 |
| SMI                                 | 0.760                                  | 0.744                              | 0.922             | 0.942  | 0.654                 | 0.070                | 0.463                         | 0.502                        | 0.121                           | 0.940                          | 0.010                         | 0.002                        | 0.005  |        | 0.859                                                 | 0.381                         | 0.283                | 0.742                   | -0.099 | -0.155 | -0.196 | 0.351                     | -0.136              | -0.247 |
| symptom of fatigue (VAS scale)      | 0.092                                  | -0.167                             | 0.187             | -0.274 | 0.182                 | 0.158                | -0.340                        | -0.186                       | -0.155                          | -0.201                         | -0.130                        | 0.025                        | 0.141  | -0.038 |                                                       | 0.552                         | 0.094                | 0.100                   | 0.220  | -0.003 | 0.114  | -0.115                    | -0.276              | 0.116  |
| symptom of apathy (VAS scale)       | -0.322                                 | -0.030                             | 0.289             | -0.037 | -0.143                | 0.117                | -0.233                        | -0.110                       | -0.257                          | -0.281                         | -0.252                        | -0.182                       | -0.226 | -0.183 | 0.004                                                 |                               | -0.090               | -0.095                  | 0.285  | -0.067 | 0.353  | -0.141                    | -0.364              | -0.027 |
| anxiety scale (HADS)                | 0.046                                  | 0.034                              | -0.037            | -0.109 | 0.274                 | -0.048               | -0.084                        | 0.035                        | -0.147                          | 0.068                          | -0.062                        | -0.324                       | -0.172 | -0.224 | 0.655                                                 | 0.669                         |                      | 0.536                   | -0.239 | 0.679  | 0.481  | -0.217                    | -0.042              | 0.016  |
| depression scale (HADS)             | 0.160                                  | 0.150                              | -0.192            | -0.280 | 0.017                 | -0.080               | -0.068                        | 0.216                        | 0.236                           | 0.180                          | -0.076                        | 0.078                        | -0.037 | 0.069  | 0.636                                                 | 0.652                         | 0.006                |                         | 0.201  | 0.301  | 0.090  | -0.219                    | -0.194              | -0.192 |
| SNAQ                                | 0.969                                  | 0.885                              | 0.689             | 0.189  | 0.374                 | 0.744                | 0.938                         | 0.828                        | 0.907                           | 0.450                          | 0.458                         | 0.837                        | 0.733  | 0.639  | 0.290                                                 | 0.167                         | 0.250                | 0.335                   |        | -0.384 | -0.193 | -0.147                    | -0.097              | 0.163  |
| CAT                                 | 0.777                                  | 0.290                              | 0.690             | 0.623  | 0.862                 | 0.093                | 0.077                         | 0.688                        | 0.674                           | 0.746                          | 0.838                         | 0.235                        | 0.244  | 0.459  | 0.990                                                 | 0.749                         | 0.000                | 0.144                   | 0.058  |        | 0.424  | -0.177                    | -0.059              | -0.027 |
| mMRC                                | 0.077                                  | 0.751                              | 0.589             | 0.633  | 0.710                 | 0.962                | 0.937                         | 0.864                        | 0.283                           | 0.406                          | 0.106                         | 0.104                        | 0.223  | 0.349  | 0.588                                                 | 0.084                         | 0.015                | 0.668                   | 0.356  | 0.035  |        | -0.074                    | -0.320              | -0.415 |
| FEV <sub>1,0%</sub>                 | 0.596                                  | 0.260                              | 0.024             | 0.892  | 0.946                 | 0.235                | 0.202                         | 0.821                        | 0.164                           | <b>0.011</b>                   | 0.070                         | 0.164                        | 0.154  | 0.085  | 0.584                                                 | 0.501                         | 0.298                | 0.293                   | 0.485  | 0.399  | 0.727  |                           | 0.458               | 0.121  |
| %FEV <sub>1,0</sub>                 | 0.575                                  | 0.819                              | <b>&lt;0.0001</b> | 0.398  | 0.783                 | 0.838                | 0.410                         | 0.662                        | 0.876                           | <b>0.033</b>                   | 0.293                         | 0.880                        | 0.745  | 0.516  | 0.182                                                 | 0.074                         | 0.842                | 0.352                   | 0.646  | 0.781  | 0.119  | 0.021                     |                     | 0.624  |
| %VC                                 | 0.696                                  | 0.527                              | 0.041             | 0.546  | 0.804                 | 0.443                | 0.541                         | 0.234                        | 0.256                           | 0.262                          | 0.437                         | 0.357                        | 0.604  | 0.235  | 0.581                                                 | 0.897                         | 0.941                | 0.358                   | 0.437  | 0.899  | 0.039  | 0.565                     | 0.001               |        |

**A) VAS scales**

**Group A**

fatigue

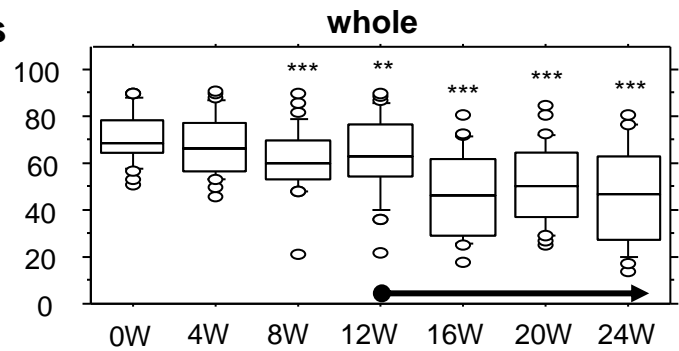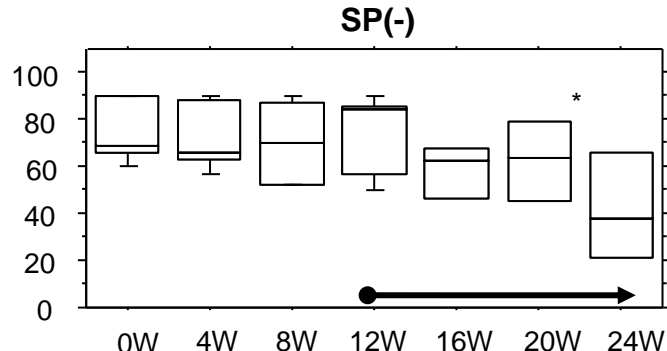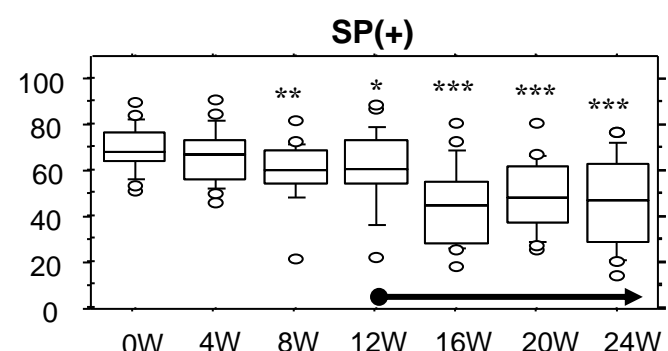

motivated

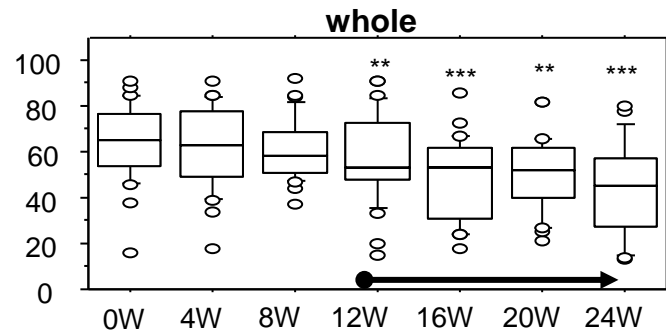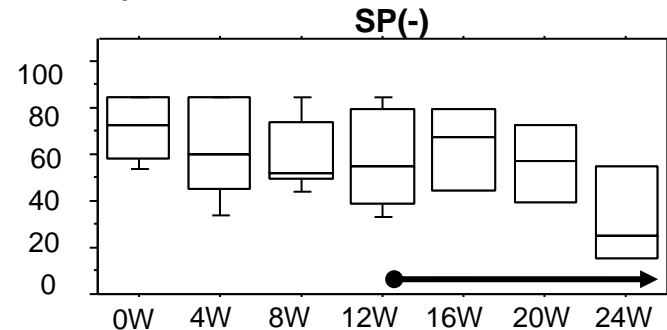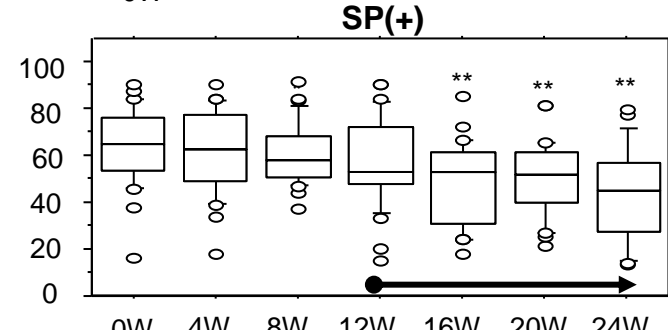

**Group B**

fatigue

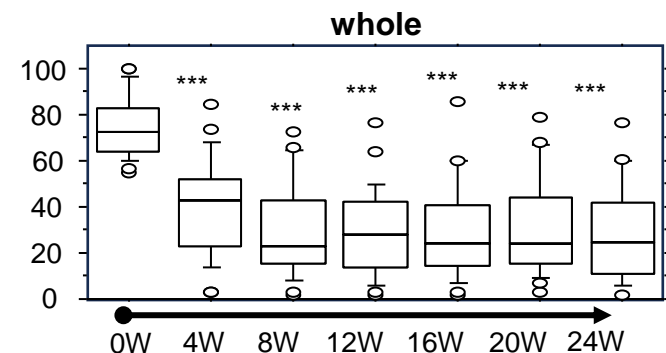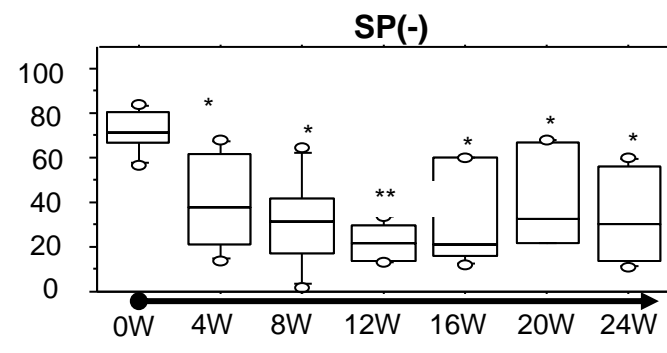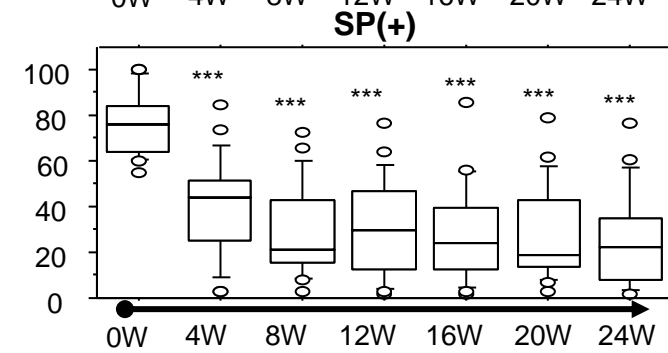

motivated

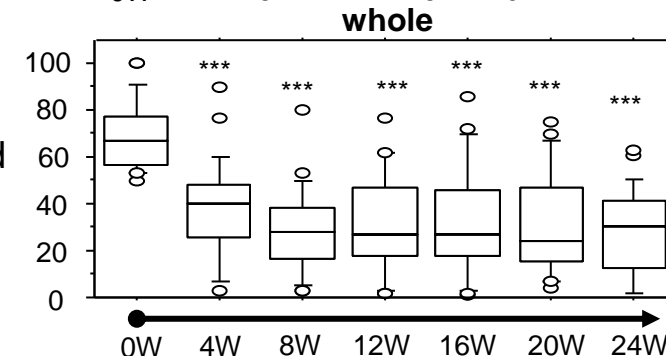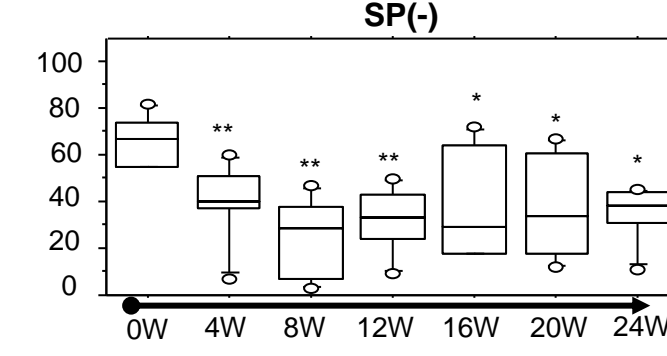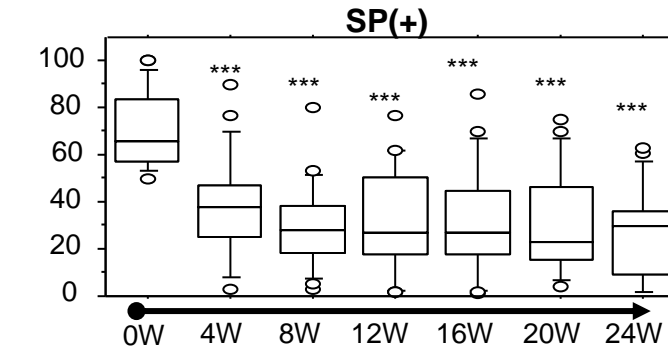

**B) HADS****Group A**

Anxiety Scale

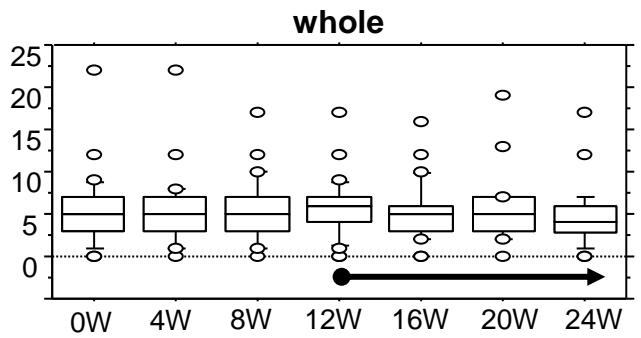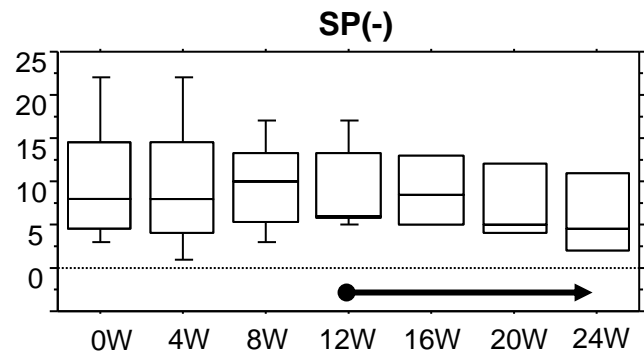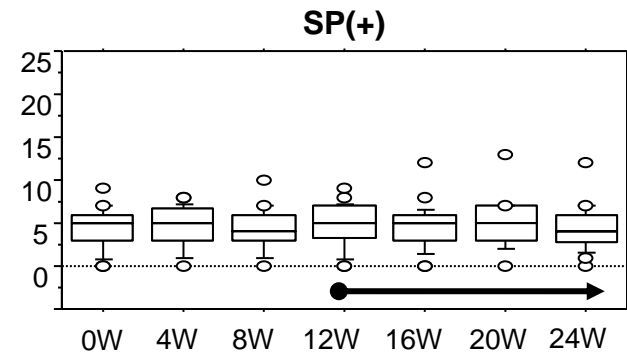

Depression Scale

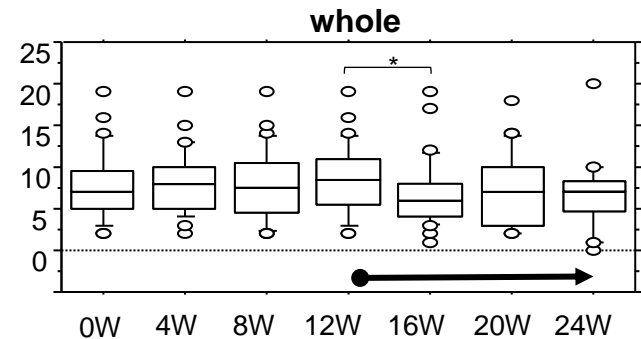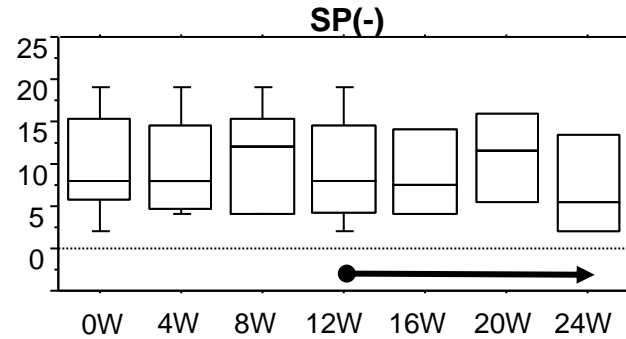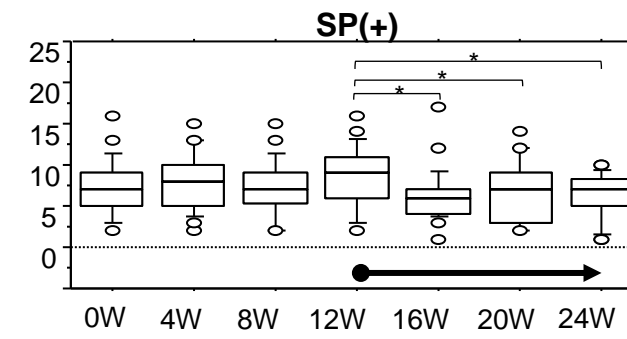**Group B**

Anxiety Scale

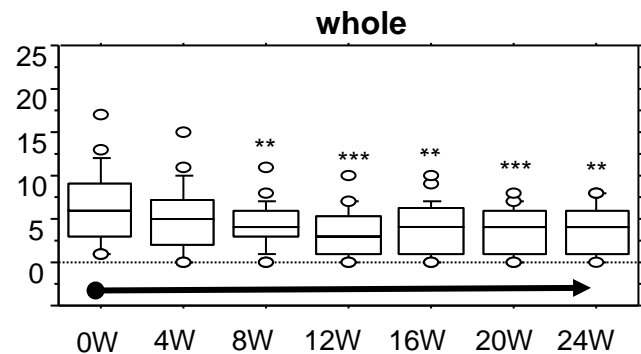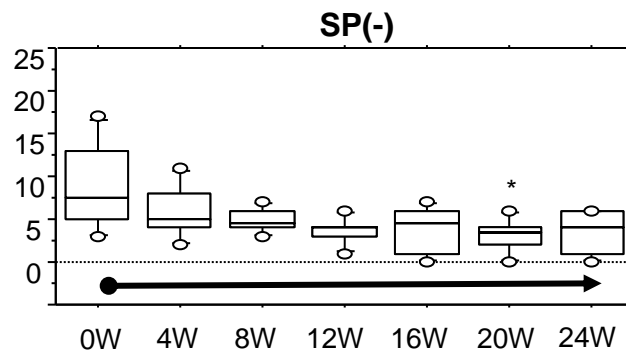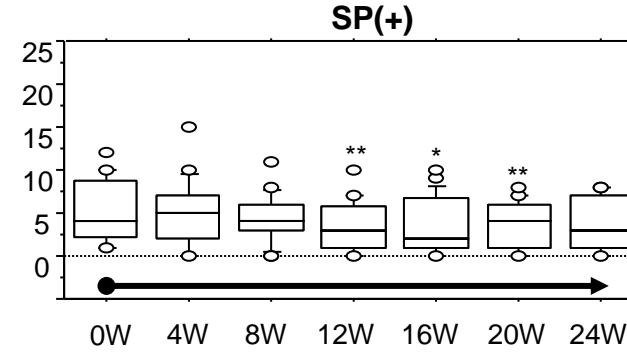

Depression Scale

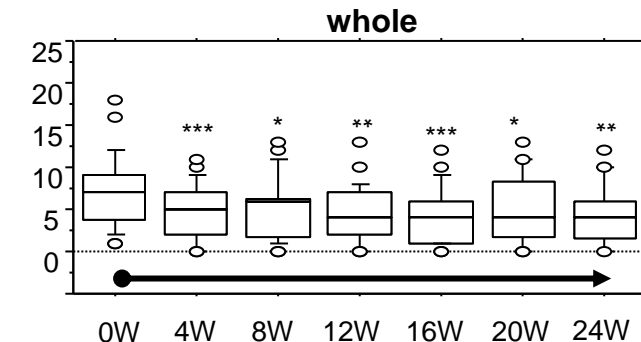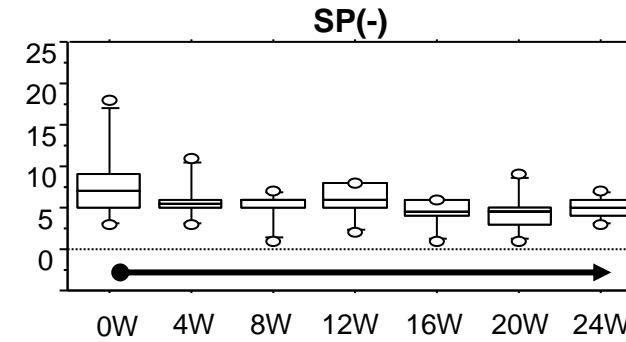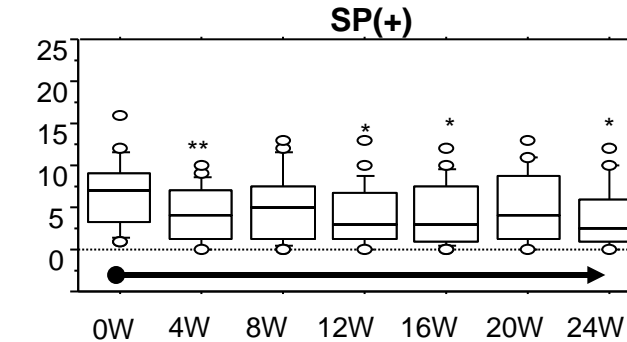



**C) SNAQ**

**Group A**

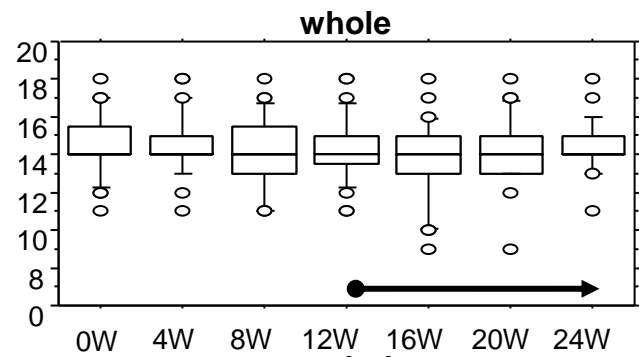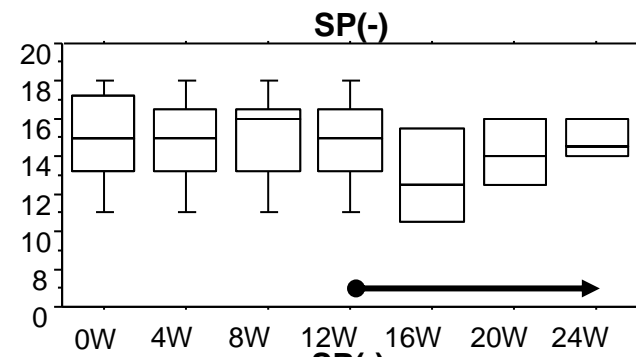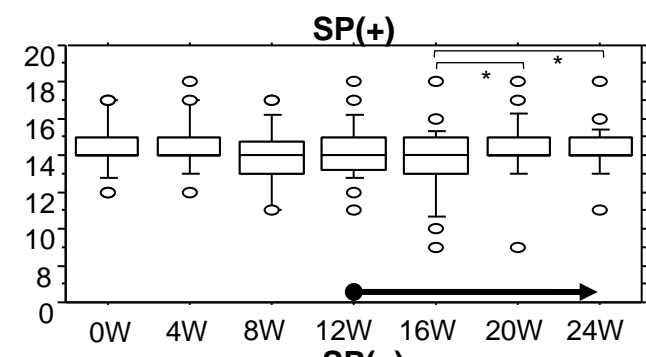

**Group B**

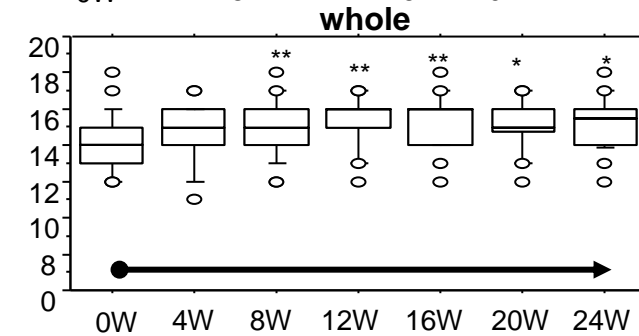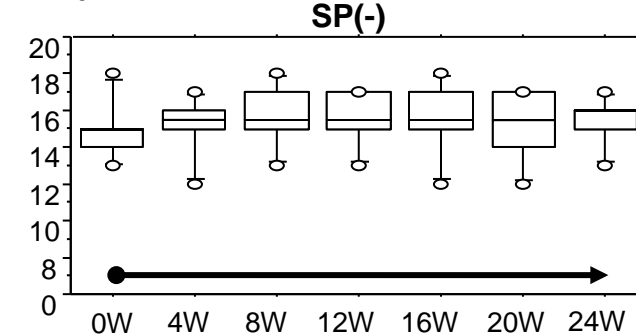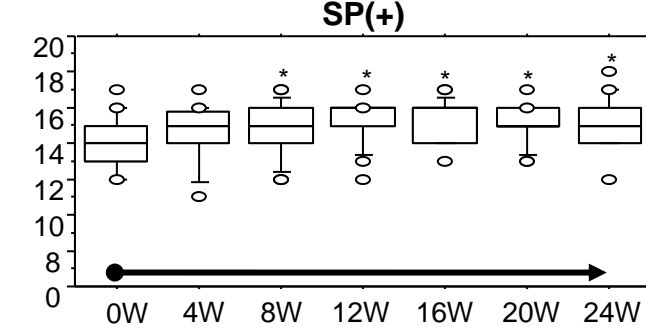

**D) CAT**

**Group A**

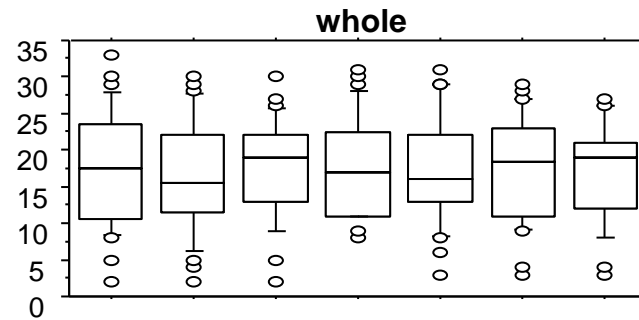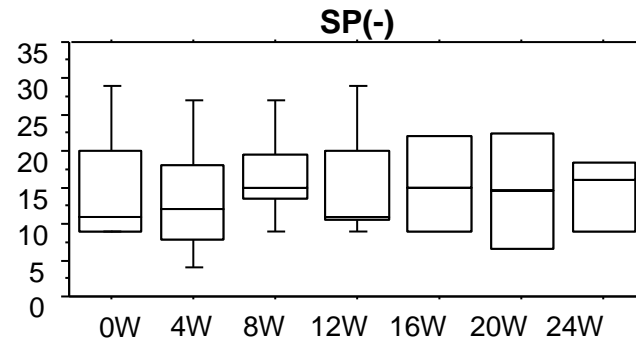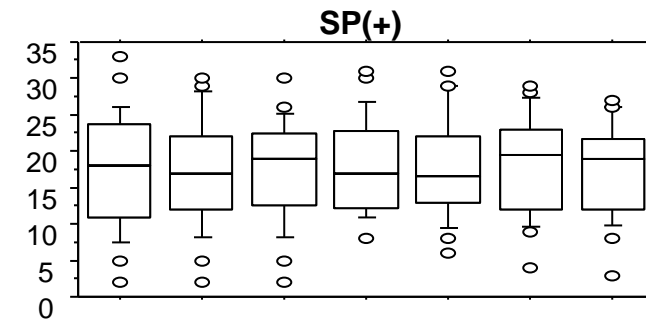

**Group B**

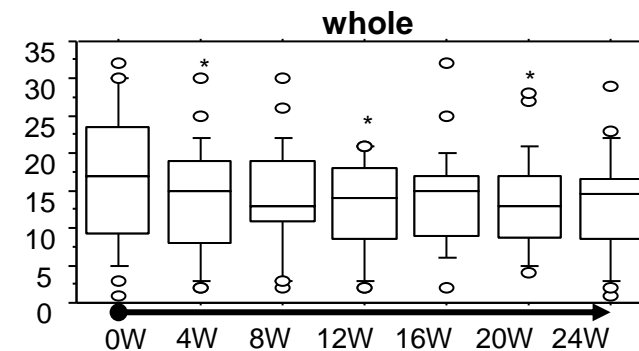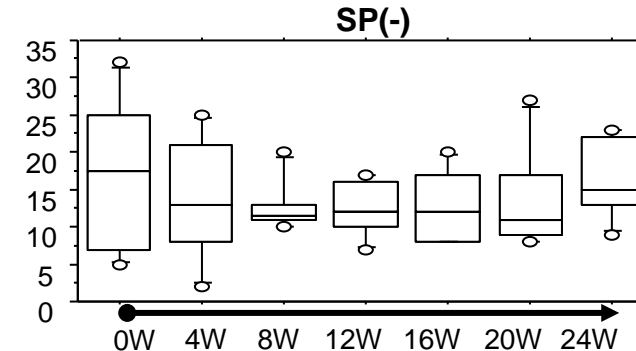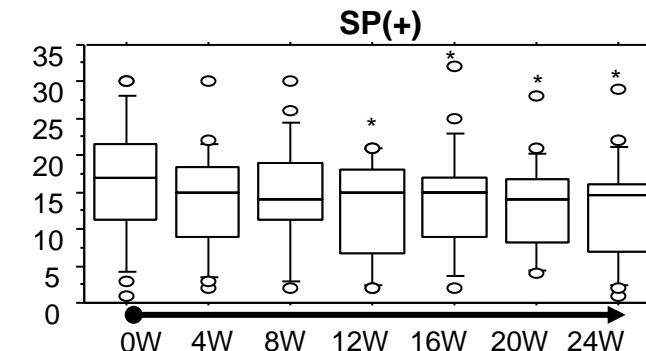

E) mMRC

Group A

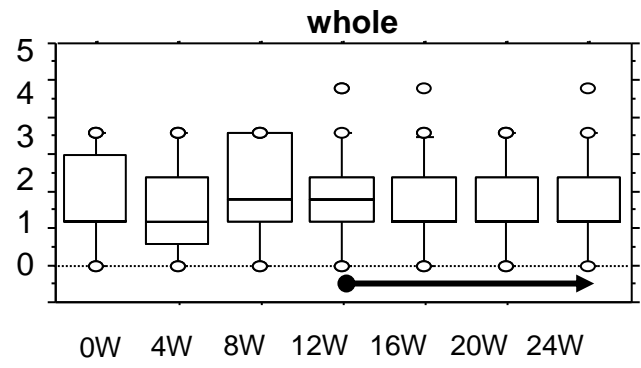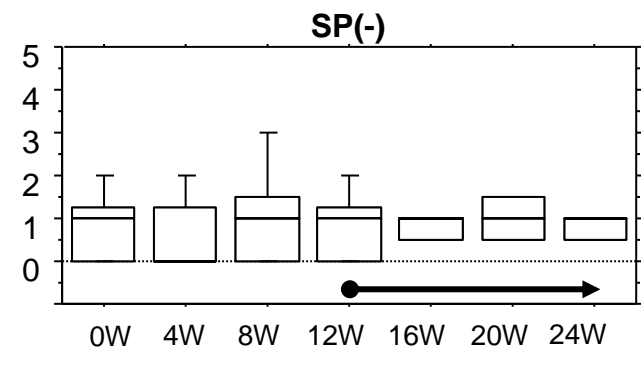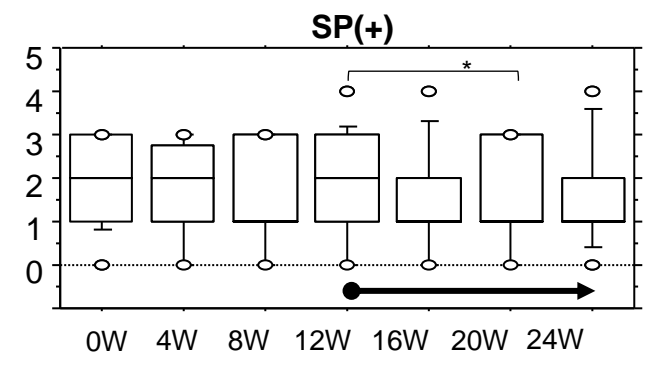

Group B

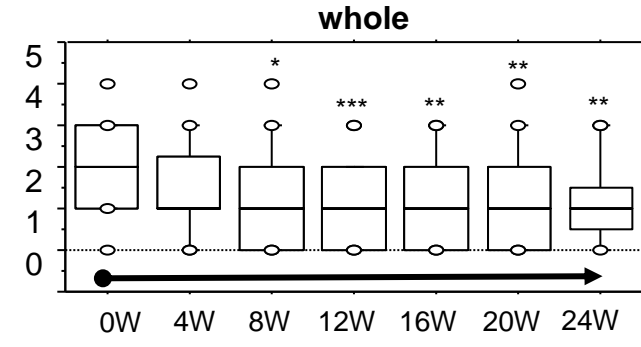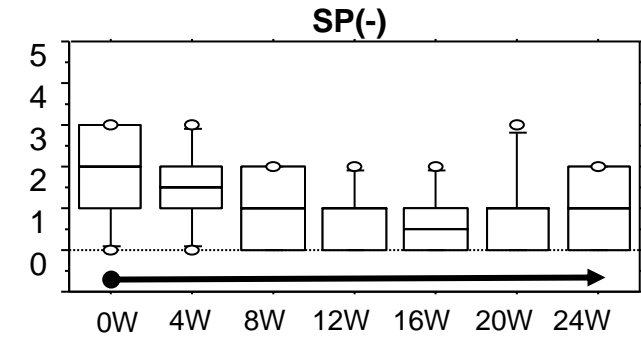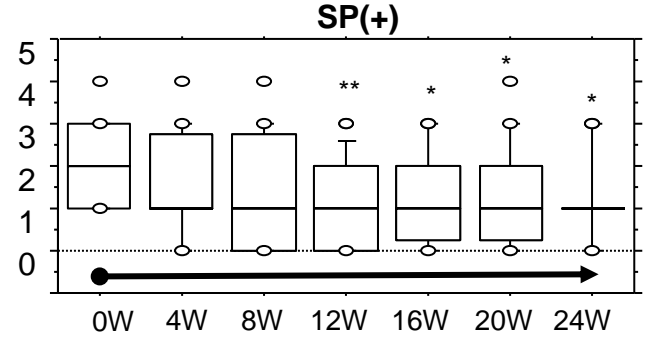

● → Duration of administration of Ninjin'yoeito

# F) SMI

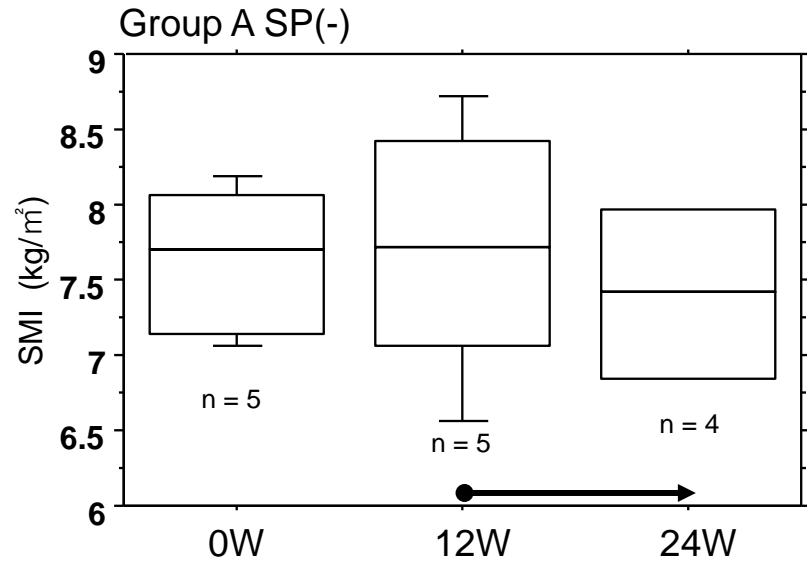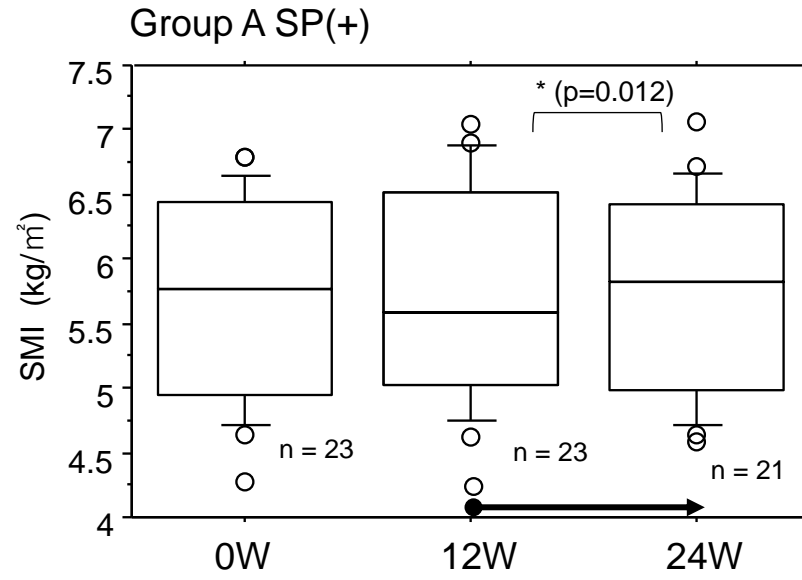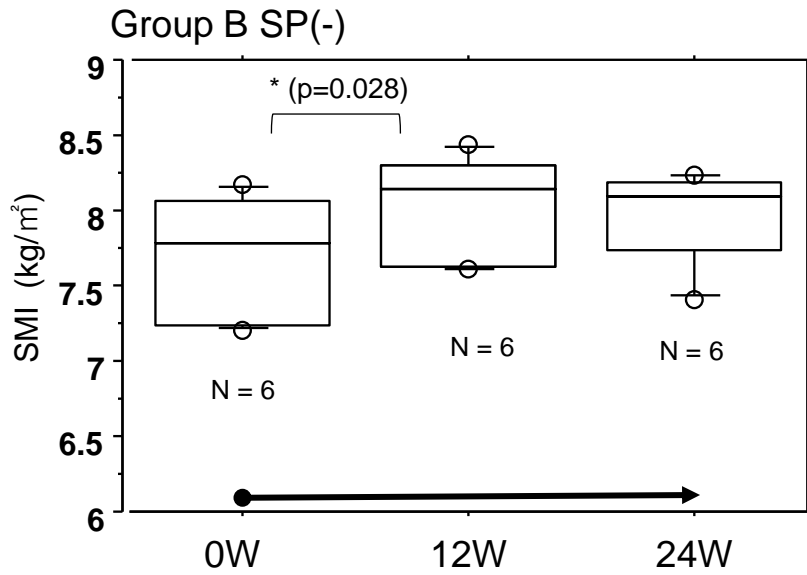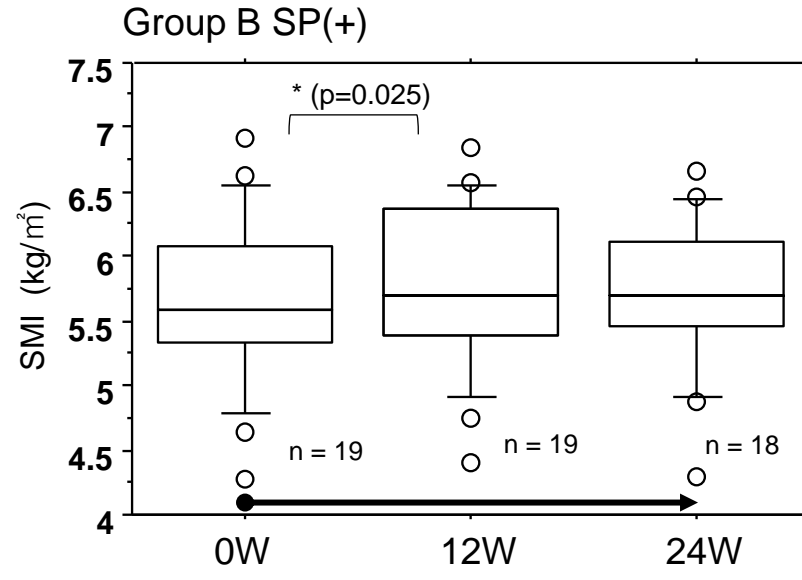

● → Duration of administration of Ninjin'yoeito

# G) pulmonary function tests

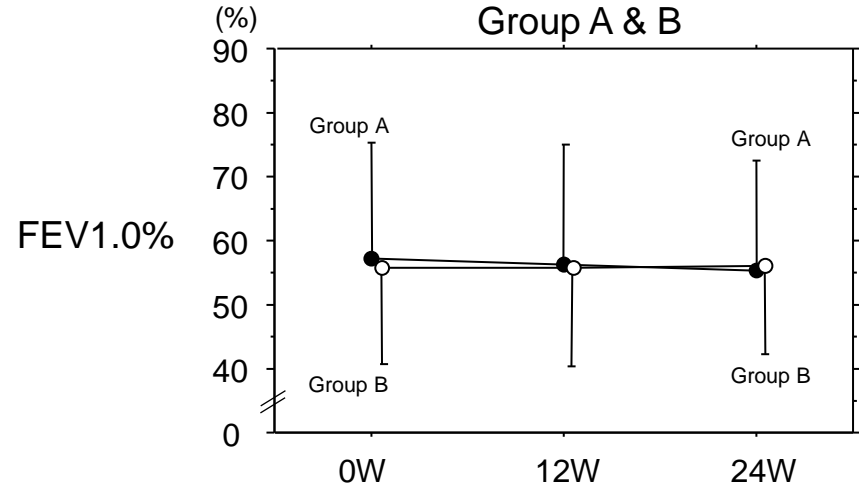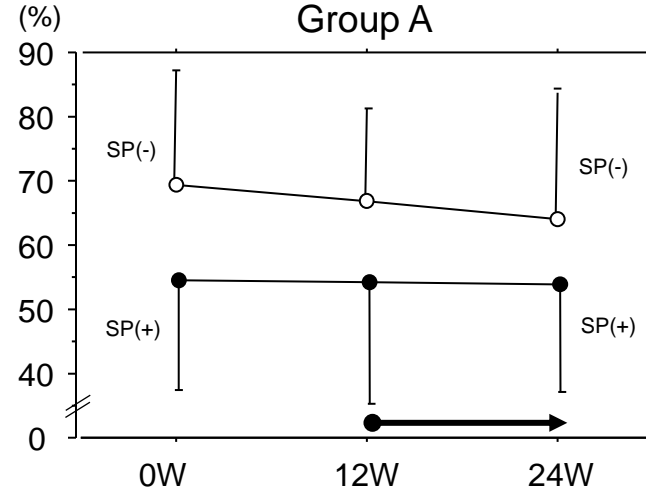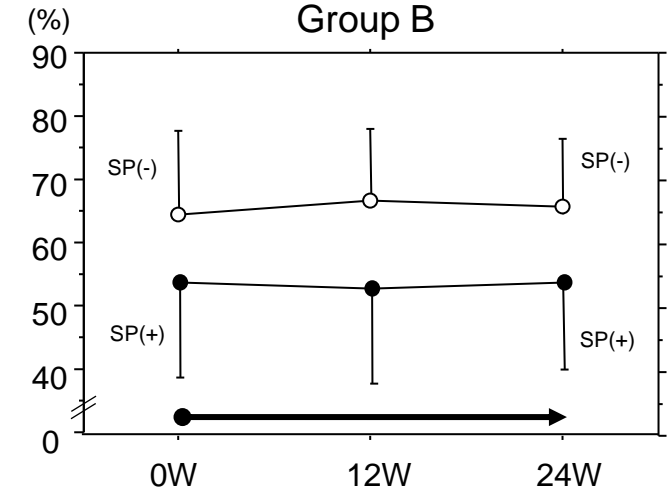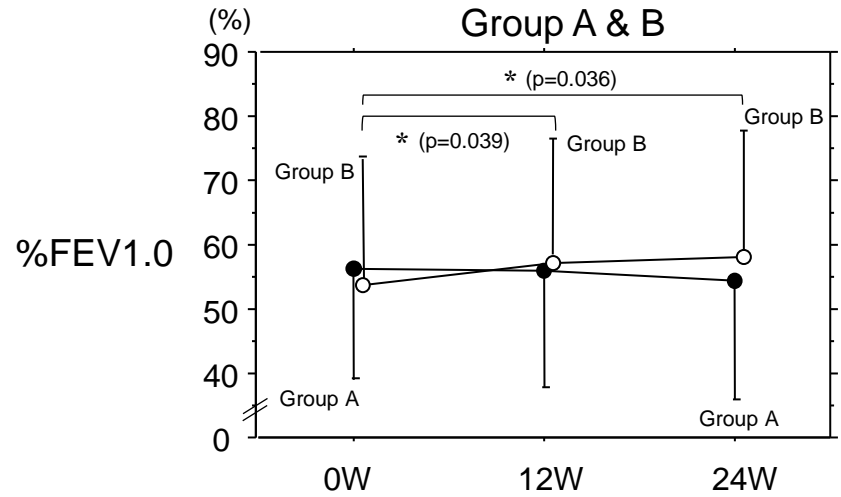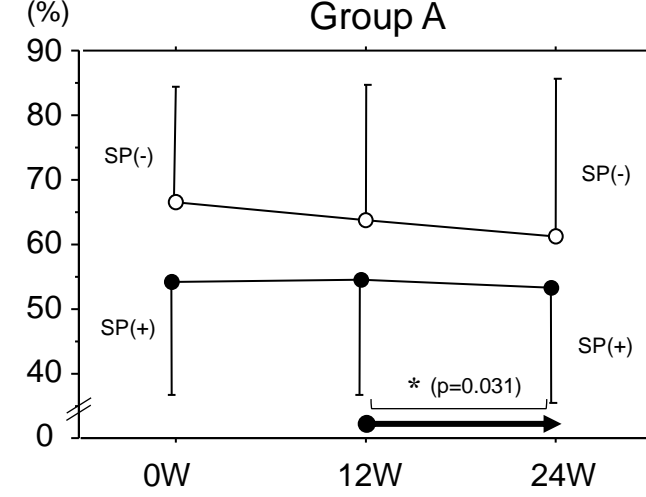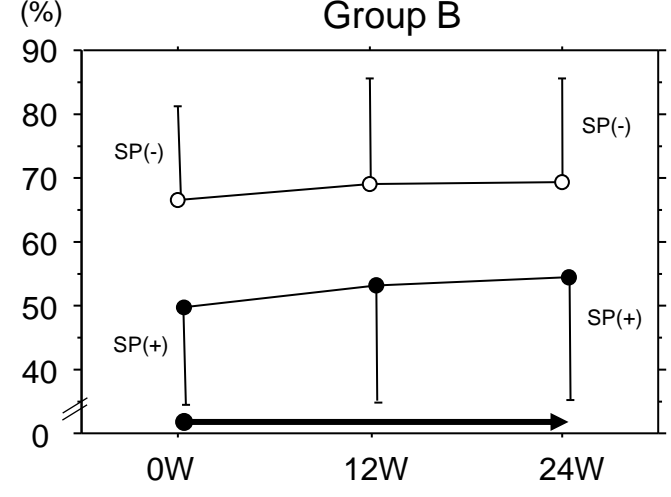

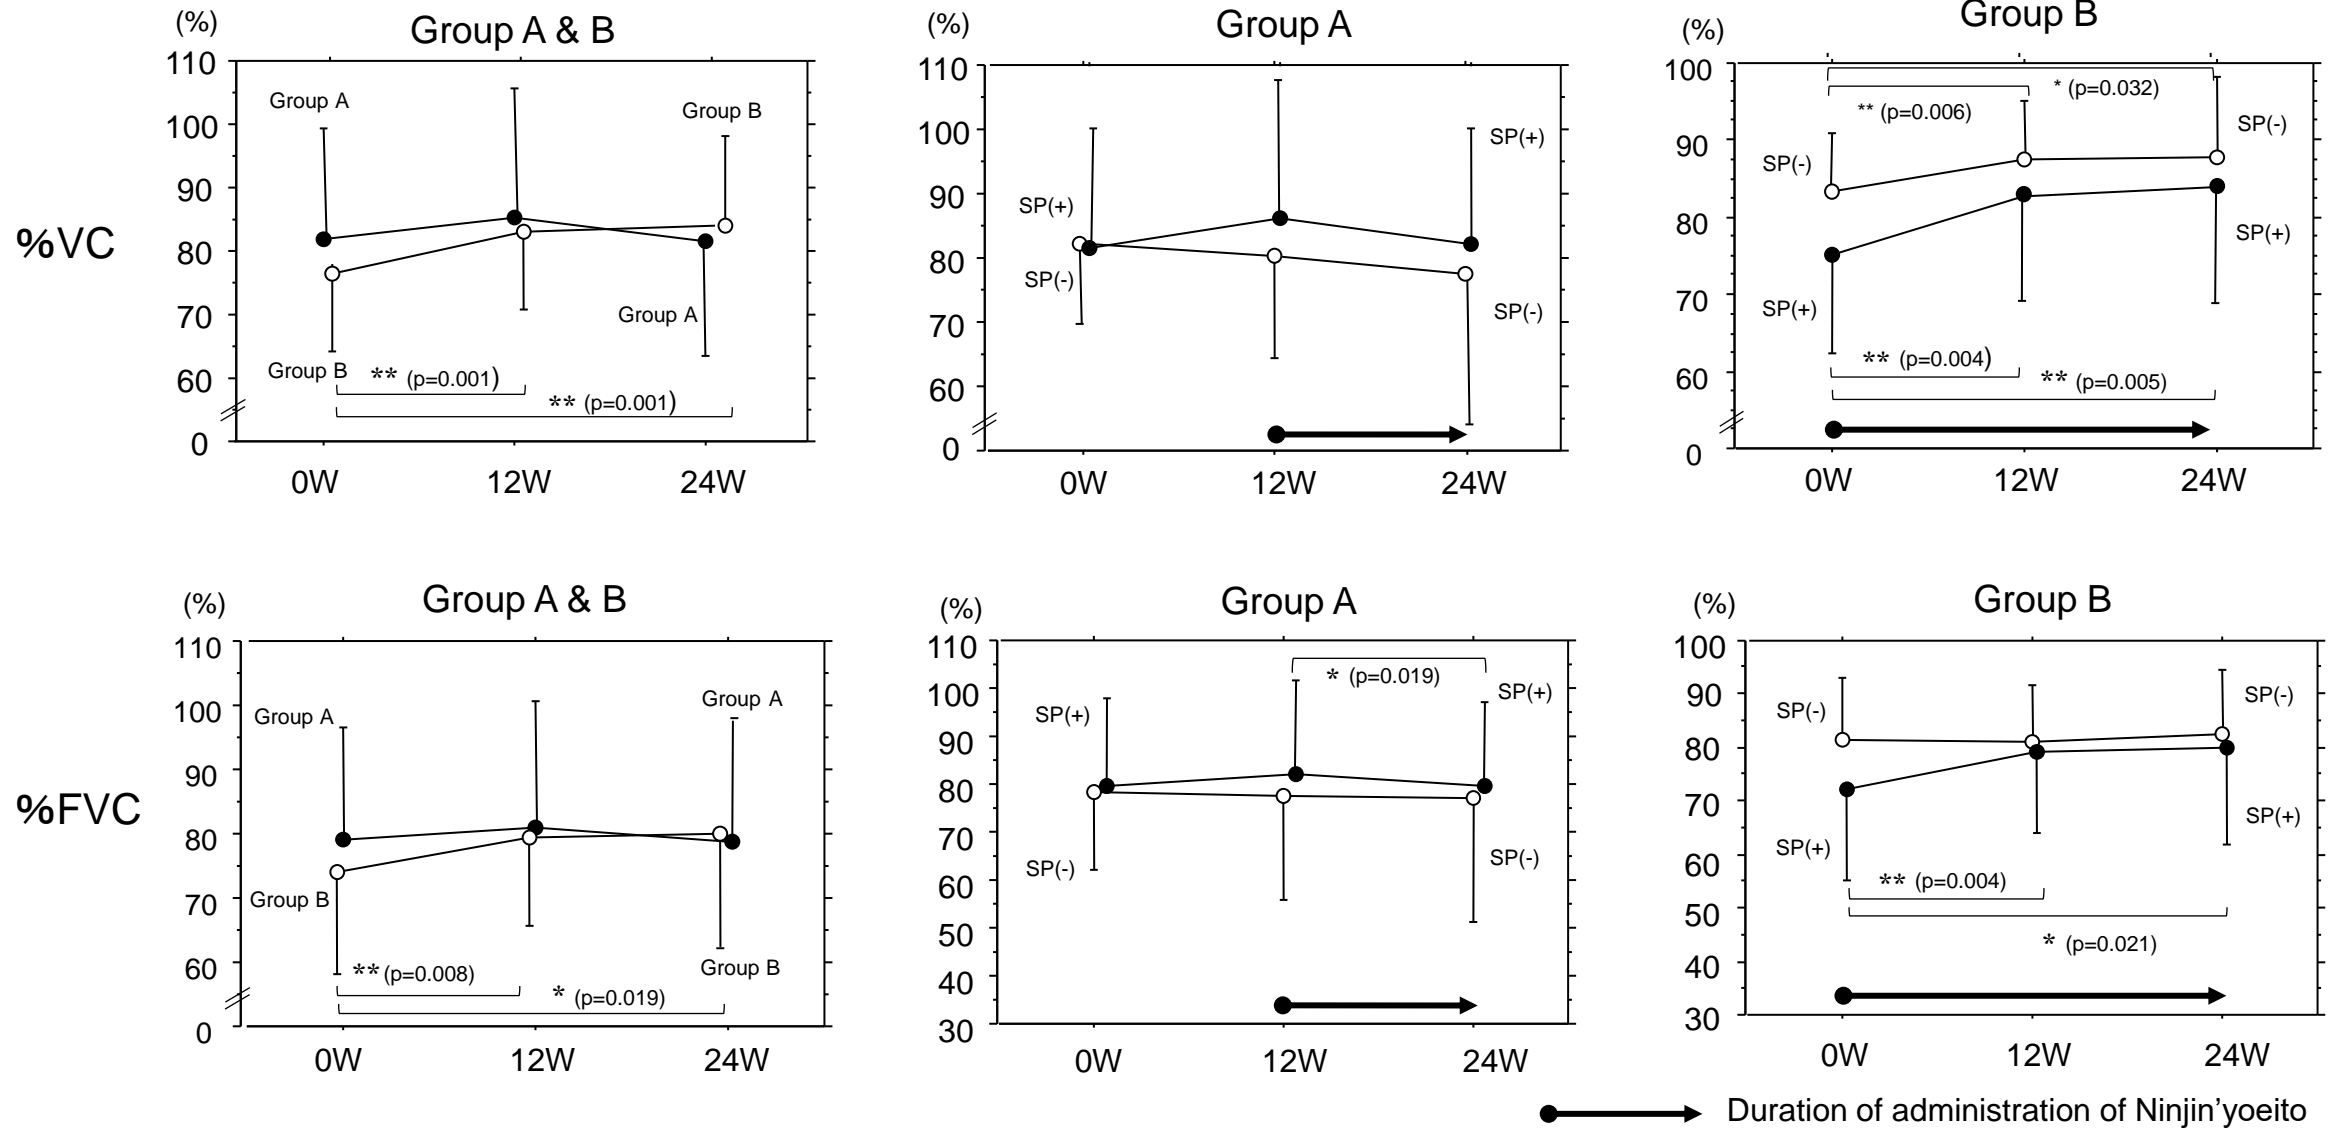

Supplement Figure 1: Time-course changes in A) VAS scales, B) HADS, C) SNAQ, D) CAT, E) mMRC, F) SMI, and G) pulmonary function tests in Groups A and B with or without sarcopenia (SP). Comparison with the values at 0W in each group. \*  $p < 0.05$ , \*\*  $p < 0.01$  and \*\*\*  $p < 0.001$ , A and G: paired student *t*-test, B, C, D, E, and F: Wilcoxon rank order test
